# Supplementary material for: Antioxidant Strategy to Prevent Simulated Microgravity-Induced Effects on Bone Osteoblasts
Source: MDPI journal article supplement (doi:10.3390/ijms21103638), 2020-05-21
Supplement: s1 [file s1]

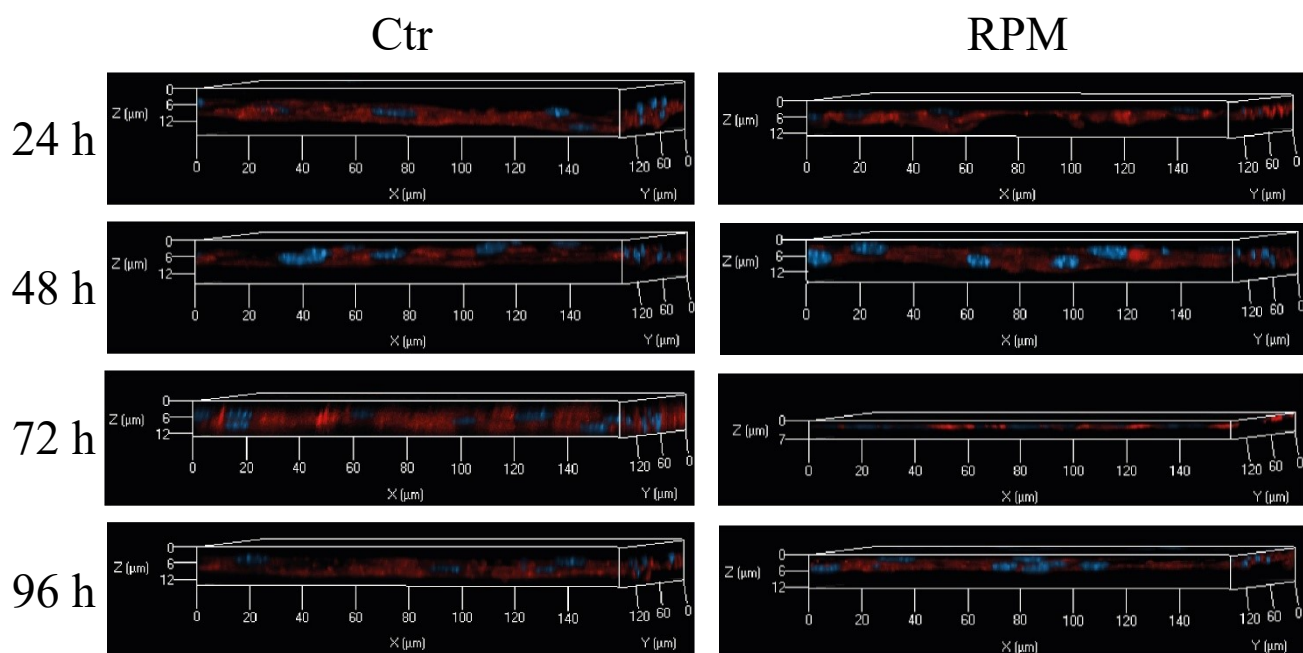

**Supplementary Figure 1.** Representative orthogonal (X-Y-Z) reconstruction of z-stack images from control cells at 1g (Ctr) or cells exposed to s-microgravity (RPM) at different times (24, 48, 72 and 96 h), stained with Alexa Fluor 546 Phalloidin (for f-actin) and DAPI (for nuclei).
