# Supplementary material for: Antioxidant Strategy to Prevent Simulated Microgravity-Induced Effects on Bone Osteoblasts
Source: MDPI journal article supplement (doi:10.3390/ijms21103638), 2020-05-21
Supplement: s1 [file s1]

## Supplementary Tables

**Tables S1A and B. A. Intracellular ROS Levels.** Data are expressed as f/cell number and are means  $\pm$  SEM from three independent experiments (each containing eight repetitions). The data collected in these tables came from experiments in which 100  $\mu$ M Trolox (Trolox) was used. Trolox was solubilized in dimethyl sulphoxide (DMSO) at concentration of 100 mM then diluted in cell medium at a final concentration of 100  $\mu$ M. In each experimental set, samples were also treated with DMSO (1  $\mu$ l dimethyl sulphoxide in 1 ml medium) to exclude its possible effect or toxicity on cells. **B.** Statistical significance calculated by Student's t-test (Prism5 software, GraphPad, San Diego, CA, USA).

### A

| Time | Ctr               | Ctr + DMSO        | Ctr + Trolox      | RPM               | RPM + DMSO        | RPM + Trolox      |
|------|-------------------|-------------------|-------------------|-------------------|-------------------|-------------------|
| 24 h | 0.173 $\pm$ 0.010 | 0.175 $\pm$ 0.003 | 0.161 $\pm$ 0.006 | 0.392 $\pm$ 0.012 | 0.381 $\pm$ 0.012 | 0.168 $\pm$ 0.020 |
| 48 h | 0.190 $\pm$ 0.024 | 0.201 $\pm$ 0.019 | 0.197 $\pm$ 0.005 | 0.535 $\pm$ 0.025 | 0.569 $\pm$ 0.010 | 0.203 $\pm$ 0.006 |
| 72 h | 0.179 $\pm$ 0.037 | 0.189 $\pm$ 0.021 | 0.181 $\pm$ 0.005 | 0.453 $\pm$ 0.042 | 0.413 $\pm$ 0.010 | 0.135 $\pm$ 0.035 |
| 96 h | 0.192 $\pm$ 0.018 | 0.197 $\pm$ 0.001 | 0.166 $\pm$ 0.011 | 0.447 $\pm$ 0.034 | 0.458 $\pm$ 0.015 | 0.159 $\pm$ 0.036 |

### B

| Sample comparison        | 24 h         | 48 h         | 72 h         | 96 h         |
|--------------------------|--------------|--------------|--------------|--------------|
| Ctr vs RPM               | ***p < 0.001 | ***p < 0.001 | ***p < 0.001 | ***p < 0.001 |
| Ctr+DMSO vs RPM+DMSO     | ***p < 0.001 | ***p < 0.001 | ***p < 0.001 | ***p < 0.001 |
| Ctr+Trolox vs RPM+Trolox | p = 0.754    | p = 0.485    | p = 0.263    | p = 0.862    |
| Ctr+DMSO vs Ctr+Trolox   | p = 0.105    | p = 0.849    | p = 0.730    | p = 0.050    |
| RPM+DMSO vs RPM+Trolox   | ***p < 0.001 | ***p < 0.001 | **p < 0.005  | **p < 0.005  |

**Tables S2A and B. A. Intracellular Ca<sup>2+</sup> Levels.** Data are expressed as f/cell number and are means  $\pm$  SEM from three independent experiments (each containing eight repetitions). **B.** Statistical significance calculated by Student's t-test (Prism5 software, GraphPad, San Diego, CA, USA).

### A

| Time | Ctr               | Ctr + DMSO        | Ctr + Trolox      | RPM               | RPM + DMSO        | RPM + Trolox      |
|------|-------------------|-------------------|-------------------|-------------------|-------------------|-------------------|
| 24 h | 0.195 $\pm$ 0.007 | 0.181 $\pm$ 0.005 | 0.196 $\pm$ 0.020 | 0.274 $\pm$ 0.011 | 0.264 $\pm$ 0.012 | 0.220 $\pm$ 0.013 |
| 48 h | 0.171 $\pm$ 0.005 | 0.167 $\pm$ 0.005 | 0.156 $\pm$ 0.004 | 0.273 $\pm$ 0.016 | 0.269 $\pm$ 0.010 | 0.159 $\pm$ 0.006 |
| 72 h | 0.199 $\pm$ 0.004 | 0.195 $\pm$ 0.002 | 0.206 $\pm$ 0.008 | 0.218 $\pm$ 0.018 | 0.201 $\pm$ 0.010 | 0.207 $\pm$ 0.008 |
| 96 h | 0.175 $\pm$ 0.036 | 0.183 $\pm$ 0.001 | 0.183 $\pm$ 0.009 | 0.215 $\pm$ 0.005 | 0.208 $\pm$ 0.015 | 0.211 $\pm$ 0.016 |

### B

| Sample comparison        | 24 h         | 48 h         | 72 h      | 96 h      |
|--------------------------|--------------|--------------|-----------|-----------|
| Ctr vs RPM               | ***p < 0.001 | ***p < 0.001 | p = 0.361 | p = 0.333 |
| Ctr+DMSO vs RPM+DMSO     | **p < 0.005  | ***p < 0.001 | p = 0.588 | p = 0.172 |
| Ctr+Trolox vs RPM+Trolox | p = 0.371    | p = 0.699    | p = 0.934 | p = 0.202 |
| Ctr+DMSO vs Ctr+Trolox   | p = 0.507    | p = 0.161    | p = 0.253 | p > 0.999 |
| RPM+DMSO vs RPM+Trolox   | *p < 0.05    | ***p < 0.001 | p = 0.664 | p = 0.898 |

**Tables S3A and B. A. Mitochondrial membrane potential.** Data are expressed as fred/fgreen ratio and are means  $\pm$  SEM from three independent experiments (each containing eight repetitions). **B.** Statistical significance calculated by Student's t-test (Prism5 software, GraphPad, San Diego, CA, USA).

### A

| Time | Ctr               | Ctr + DMSO        | Ctr + Trolox      | RPM               | RPM + DMSO        | RPM + Trolox      |
|------|-------------------|-------------------|-------------------|-------------------|-------------------|-------------------|
| 24 h | 0.698 $\pm$ 0.020 | 0.701 $\pm$ 0.003 | 0.690 $\pm$ 0.010 | 0.696 $\pm$ 0.030 | 0.699 $\pm$ 0.010 | 0.673 $\pm$ 0.110 |
| 48 h | 0.718 $\pm$ 0.027 | 0.711 $\pm$ 0.023 | 0.588 $\pm$ 0.110 | 0.577 $\pm$ 0.030 | 0.566 $\pm$ 0.031 | 0.705 $\pm$ 0.047 |
| 72 h | 0.573 $\pm$ 0.015 | 0.564 $\pm$ 0.015 | 0.501 $\pm$ 0.010 | 0.531 $\pm$ 0.010 | 0.519 $\pm$ 0.010 | 0.552 $\pm$ 0.028 |
| 96 h | 0.608 $\pm$ 0.024 | 0.617 $\pm$ 0.02  | 0.627 $\pm$ 0.020 | 0.615 $\pm$ 0.023 | 0.635 $\pm$ 0.02  | 0.635 $\pm$ 0.020 |

### B

| Sample comparison        | 24 h      | 48 h        | 72 h      | 96 h      |
|--------------------------|-----------|-------------|-----------|-----------|
| Ctr vs RPM               | p = 0.958 | **p < 0.005 | *p < 0.05 | p = 0.850 |
| Ctr+DMSO vs RPM+DMSO     | p = 0.857 | **p < 0.005 | *p < 0.05 | p = 0.559 |
| Ctr+Trolox vs RPM+Trolox | p = 0.885 | p = 0.383   | p = 0.161 | p = 0.791 |
| Ctr+DMSO vs Ctr+Trolox   | p = 0.352 | p = 0.335   | *p < 0.05 | p = 0.753 |
| RPM+DMSO vs RPM+Trolox   | p = 0.760 | *p < 0.05   | *p < 0.05 | p > 0.999 |

**Tables S4A and B. A. Glucose levels in the medium.** Data are expressed as (μg glucose/ml)/cell number and are means ± SEM from three independent experiments (each containing five repetitions). **B.** Statistical significance calculated by Student's t-test (Prism5 software, GraphPad, San Diego, CA, USA).

**A**

| Time | Ctr           | Ctr + DMSO    | Ctr + Trolox  | RPM           | RPM + DMSO    | RPM + Trolox  |
|------|---------------|---------------|---------------|---------------|---------------|---------------|
| 24 h | 0.231 ± 0.001 | 0.215 ± 0.008 | 0.219 ± 0.019 | 0.318 ± 0.005 | 0.323 ± 0.001 | 0.262 ± 0.048 |
| 48 h | 0.144 ± 0.003 | 0.139 ± 0.003 | 0.135 ± 0.003 | 0.247 ± 0.004 | 0.235 ± 0.005 | 0.148 ± 0.003 |
| 72 h | 0.109 ± 0.001 | 0.103 ± 0.002 | 0.103 ± 0.001 | 0.175 ± 0.003 | 0.166 ± 0.001 | 0.108 ± 0.002 |
| 96 h | 0.106 ± 0.001 | 0.101 ± 0.003 | 0.101 ± 0.001 | 0.171 ± 0.004 | 0.163 ± 0.003 | 0.104 ± 0.002 |

**B**

| Sample comparison        | 24 h         | 48 h         | 72 h         | 96 h         |
|--------------------------|--------------|--------------|--------------|--------------|
| Ctr vs RPM               | ***p < 0.001 | ***p < 0.001 | ***p < 0.001 | ***p < 0.001 |
| Ctr+DMSO vs RPM+DMSO     | ***p < 0.001 | ***p < 0.001 | ***p < 0.001 | ***p < 0.001 |
| Ctr+Trolox vs RPM+Trolox | p = 0.452    | *p < 0.05    | p = 0.089    | p = 0.251    |
| Ctr+DMSO vs Ctr+Trolox   | p = 0.856    | p = 0.399    | p > 0.9999   | p > 0.9999   |
| RPM+DMSO vs RPM+Trolox   | ***p < 0.001 | ***p < 0.001 | ***p < 0.001 | ***p < 0.001 |

**Tables S5A and B. A. Lactate levels in the medium.** Data are expressed as (nmol lactate/ml)/cell number and are means ± SEM from three independent experiments (each containing five repetitions). **B.** Statistical significance calculated by Student's t-test (Prism5 software, GraphPad, San Diego, CA, USA).

**A**

| Time | Ctr           | Ctr + DMSO    | Ctr + Trolox  | RPM           | RPM + DMSO    | RPM + Trolox  |
|------|---------------|---------------|---------------|---------------|---------------|---------------|
| 24 h | 0.417 ± 0.002 | 0.401 ± 0.021 | 0.341 ± 0.020 | 0.629 ± 0.020 | 0.617 ± 0.023 | 0.284 ± 0.021 |
| 48 h | 0.357 ± 0.005 | 0.323 ± 0.017 | 0.271 ± 0.017 | 0.571 ± 0.032 | 0.565 ± 0.009 | 0.249 ± 0.022 |
| 72 h | 0.215 ± 0.009 | 0.209 ± 0.015 | 0.201 ± 0.015 | 0.445 ± 0.025 | 0.431 ± 0.030 | 0.200 ± 0.029 |
| 96 h | 0.195 ± 0.003 | 0.185 ± 0.013 | 0.179 ± 0.019 | 0.384 ± 0.019 | 0.373 ± 0.017 | 0.148 ± 0.018 |

**B**

| Sample comparison        | 24 h         | 48 h         | 72 h         | 96 h         |
|--------------------------|--------------|--------------|--------------|--------------|
| Ctr vs RPM               | ***p < 0.001 | ***p < 0.001 | ***p < 0.001 | ***p < 0.001 |
| Ctr+DMSO vs RPM+DMSO     | ***p < 0.001 | ***p < 0.001 | ***p < 0.001 | ***p < 0.001 |
| Ctr+Trolox vs RPM+Trolox | p = 0.359    | p = 0.473    | p = 0.977    | p = 0.302    |
| Ctr+DMSO vs Ctr+Trolox   | p = 0.107    | p = 0.097    | p = 0.725    | p = 0.807    |
| RPM+DMSO vs RPM+Trolox   | ***p < 0.001 | ***p < 0.001 | ***p < 0.001 | ***p < 0.001 |

**Tables S6A and B. A. Cell Height.** Data are expressed as μm and are means ± SEM from three independent experiments (each containing five repetitions). **B.** Statistical significance calculated by Student's t-test (Prism5 software, GraphPad, San Diego, CA, USA).

**A**

| Time | Ctr         | Ctr + DMSO  | Ctr + Trolox | RPM         | RPM + DMSO  | RPM + Trolox |
|------|-------------|-------------|--------------|-------------|-------------|--------------|
| 24 h | 6.10 ± 0.11 | 6.05 ± 0.12 | 5.93 ± 0.20  | 6.32 ± 0.17 | 6.27 ± 0.21 | 5.77 ± 0.13  |
| 48 h | 6.41 ± 0.09 | 6.41 ± 0.11 | 6.15 ± 0.11  | 6.88 ± 0.10 | 6.93 ± 0.09 | 6.46 ± 0.10  |
| 72 h | 6.21 ± 0.12 | 6.12 ± 0.10 | 6.09 ± 0.13  | 4.63 ± 0.14 | 4.51 ± 0.16 | 6.54 ± 0.10  |
| 96 h | 6.71 ± 0.19 | 6.82 ± 0.17 | 6.51 ± 0.12  | 5.03 ± 0.11 | 4.97 ± 0.10 | 6.32 ± 0.11  |

**B**

| Sample comparison        | 24 h      | 48 h      | 72 h       | 96 h       |
|--------------------------|-----------|-----------|------------|------------|
| Ctr vs RPM               | p = 0.338 | *p < 0.05 | **p < 0.01 | **p < 0.01 |
| Ctr+DMSO vs RPM+DMSO     | p = 0.415 | *p < 0.05 | **p < 0.01 | **p < 0.01 |
| Ctr+Trolox vs RPM+Trolox | p = 0.235 | p = 0.445 | p = 0.504  | p = 0.279  |
| Ctr+DMSO vs Ctr+Trolox   | p = 0.250 | p = 0.233 | p = 0.291  | p = 0.296  |
| RPM+DMSO vs RPM+Trolox   | p = 0.137 | *p < 0.05 | **p < 0.01 | **p < 0.01 |

**Tables S7A and B. A. Actin filament mean length in a single cell.** Data are expressed as arbitrary unit (a.u.) and are means ± SEM from three independent experiments (each containing five repetitions). **B.** Statistical significance calculated by Student's t-test (Prism5 software, GraphPad, San Diego, CA, USA).

**A**

| Time | Ctr | Ctr + DMSO | Ctr + Trolox | RPM | RPM + DMSO | RPM + Trolox |
|------|-----|------------|--------------|-----|------------|--------------|
|------|-----|------------|--------------|-----|------------|--------------|

|             |              |              |              |              |              |              |
|-------------|--------------|--------------|--------------|--------------|--------------|--------------|
| <b>24 h</b> | 0.574 ± 0.06 | 0.560 ± 0.09 | 0.464 ± 0.05 | 0.577 ± 0.08 | 0.565 ± 0.09 | 0.435 ± 0.09 |
| <b>48 h</b> | 0.452 ± 0.05 | 0.460 ± 0.04 | 0.468 ± 0.06 | 0.771 ± 0.08 | 0.779 ± 0.09 | 0.621 ± 0.08 |
| <b>72 h</b> | 0.384 ± 0.01 | 0.391 ± 0.04 | 0.390 ± 0.04 | 0.673 ± 0.09 | 0.669 ± 0.04 | 0.372 ± 0.06 |
| <b>96 h</b> | 0.431 ± 0.02 | 0.411 ± 0.02 | 0.445 ± 0.07 | 0.661 ± 0.03 | 0.672 ± 0.03 | 0.379 ± 0.07 |

## B

| Sample comparison        | 24 h      | 48 h      | 72 h      | 96 h      |
|--------------------------|-----------|-----------|-----------|-----------|
| Ctr vs RPM               | p = 0.977 | *p< 0.05  | **p< 0.01 | **p< 0.01 |
| Ctr+DMSO vs RPM+DMSO     | p = 0.382 | *p< 0.05  | **p< 0.01 | **p< 0.01 |
| Ctr+Trolox vs RPM+Trolox | p = 0.792 | p = 0.202 | p = 0.815 | p = 0.542 |
| Ctr+DMSO vs Ctr+Trolox   | p = 0.404 | p = 0.917 | p = 0.987 | p = 0.665 |
| RPM+DMSO vs RPM+Trolox   | p = 0.365 | *p< 0.05  | *p< 0.05  | *p< 0.05  |

**Tables S8A and B. A. Nucleus area.** Data are expressed as  $\mu\text{m}^2$  and are means  $\pm$  SEM from three independent experiments (each containing five repetitions). **B.** Statistical significance calculated by Student's t-test (Prism5 software, GraphPad, San Diego, CA, USA).

## A

| Time        | Ctr             | Ctr + DMSO      | Ctr + Trolox    | RPM              | RPM + DMSO      | RPM + Trolox    |
|-------------|-----------------|-----------------|-----------------|------------------|-----------------|-----------------|
| <b>24 h</b> | 141.1 $\pm$ 9.0 | 139.7 $\pm$ 7.2 | 142.2 $\pm$ 6.8 | 128.4 $\pm$ 13.1 | 136.3 $\pm$ 8.1 | 119.1 $\pm$ 9.1 |
| <b>48 h</b> | 137.1 $\pm$ 2.6 | 135.7 $\pm$ 2.1 | 129.4 $\pm$ 2.6 | 150.4 $\pm$ 3.8  | 148.1 $\pm$ 3.3 | 130.6 $\pm$ 2.5 |
| <b>72 h</b> | 139.5 $\pm$ 6.7 | 137.1 $\pm$ 2.5 | 135.0 $\pm$ 3.1 | 136.4 $\pm$ 3.1  | 139.3 $\pm$ 4.1 | 143.4 $\pm$ 6.6 |
| <b>96 h</b> | 141.1 $\pm$ 5.1 | 143.1 $\pm$ 2.9 | 149.0 $\pm$ 6.7 | 137.1 $\pm$ 3.3  | 140.5 $\pm$ 2.9 | 133.7 $\pm$ 6.2 |

## B

| Sample comparison        | 24 h      | 48 h      | 72 h       | 96 h      |
|--------------------------|-----------|-----------|------------|-----------|
| Ctr vs RPM               | p = 0.469 | *p< 0.05  | p = 0.6961 | p = 0.546 |
| Ctr+DMSO vs RPM+DMSO     | p = 0.769 | *p< 0.05  | p = 0.671  | p = 0.561 |
| Ctr+Trolox vs RPM+Trolox | p = 0.112 | p = 0.756 | p = 0.314  | p = 0.169 |
| Ctr+DMSO vs Ctr+Trolox   | p = 0.813 | p = 0.133 | p = 0.626  | p = 0.464 |
| RPM+DMSO vs RPM+Trolox   | p = 0.231 | *p< 0.05  | p = 0.626  | p = 0.377 |

**Tables S9A and B. A. Nucleus roundness.** Data are expressed as R (see Materials and Methods and Fig. 1) and are means  $\pm$  SEM from five independent experiments (each containing three repetitions). **B.** Statistical significance calculated by Student's t-test (Prism5 software, GraphPad, San Diego, CA, USA).

## A

| Time        | Ctr             | Ctr+DMSO        | Ctr+Trolox      | RPM             | RPM+DMSO        | RPM+Trolox      |
|-------------|-----------------|-----------------|-----------------|-----------------|-----------------|-----------------|
| <b>24 h</b> | 0.85 $\pm$ 0.01 | 0.83 $\pm$ 0.02 | 0.87 $\pm$ 0.06 | 0.81 $\pm$ 0.03 | 0.84 $\pm$ 0.06 | 0.79 $\pm$ 0.03 |
| <b>48 h</b> | 0.82 $\pm$ 0.01 | 0.78 $\pm$ 0.02 | 0.79 $\pm$ 0.01 | 0.86 $\pm$ 0.01 | 0.86 $\pm$ 0.01 | 0.85 $\pm$ 0.01 |
| <b>72 h</b> | 0.80 $\pm$ 0.01 | 0.79 $\pm$ 0.01 | 0.83 $\pm$ 0.01 | 0.85 $\pm$ 0.01 | 0.87 $\pm$ 0.02 | 0.87 $\pm$ 0.01 |
| <b>96 h</b> | 0.79 $\pm$ 0.01 | 0.81 $\pm$ 0.01 | 0.80 $\pm$ 0.01 | 0.83 $\pm$ 0.01 | 0.85 $\pm$ 0.01 | 0.85 $\pm$ 0.01 |

## B

| Sample comparison        | 24 h      | 48 h      | 72 h     | 96 h      |
|--------------------------|-----------|-----------|----------|-----------|
| Ctr vs RPM               | p = 0.275 | *p< 0.05  | *p< 0.05 | *p< 0.05  |
| Ctr+DMSO vs RPM+DMSO     | p = 0.882 | *p< 0.05  | *p< 0.05 | *p< 0.05  |
| Ctr+Trolox vs RPM+Trolox | p = 0.299 | *p< 0.05  | *p< 0.05 | *p< 0.05  |
| Ctr+DMSO vs Ctr+Trolox   | p = 0.561 | p = 0.678 | p = 0.05 | p = 0.519 |
| RPM+DMSO vs RPM+Trolox   | p = 0.498 | p = 0.519 | p> 0.999 | p> 0.999  |

**Tables S10A and B. A. Western blot analysis of samples at 24 h.** Data are the relative expression calculated as ratio between the optical density (OD)  $\times$  mm<sup>2</sup> of each band and OD  $\times$  mm<sup>2</sup> of the corresponding GAPDH band, used as loading control. Data are means  $\pm$  SEM from three independent experiments. **B.** Statistical significance calculated by Student's t-test (Prism5 software, GraphPad, San Diego, CA, USA).

## A

|                                                | Ctr             | RPM            | Ctr + Trolox    | RPM + Trolox    |
|------------------------------------------------|-----------------|----------------|-----------------|-----------------|
| <b><math>\beta</math>1 integrin/<br/>GAPDH</b> | 0.70 $\pm$ 0.11 | 2.2 $\pm$ 0.40 | 0.59 $\pm$ 0.12 | 0.6 $\pm$ 0.06  |
| <b><math>\beta</math> actin/<br/>GAPDH</b>     | 0.85 $\pm$ 0.1  | 1.6 $\pm$ 0.15 | 0.71 $\pm$ 0.11 | 0.95 $\pm$ 0.12 |

**B**

| Sample comparison<br>( $\beta 1$ integrin/GAPDH) | 24 h      | Sample comparison<br>( $\beta$ actin/GAPDH) | 24 h      |
|--------------------------------------------------|-----------|---------------------------------------------|-----------|
| Ctr vs RPM                                       | *p< 0.05  | Ctr vs RPM                                  | *p< 0.05  |
| Ctr+Trolox vs RPM+Trolox                         | p = 0.944 | Ctr+Trolox vs RPM+Trolox                    | p = 0.214 |

**Tables S11A, B, C, D, E and F. A. Cell Proliferation.** Data are expressed as live-cell number and are means  $\pm$  SEM from three independent experiments (each containing three repetitions). **B.** Statistical significance in live cell number calculated by Student's t-test (Prism5 software, GraphPad, San Diego, CA, USA). **C.** Dead cell number expressed as means  $\pm$  SEM from three independent experiments (each containing three repetitions). **D.** Statistical significance in dead cell number calculated by Student's t-test (Prism5 software, GraphPad, San Diego, CA, USA). **E.** Dead cell percentage expressed as means  $\pm$  SEM from three independent experiments (each containing three repetitions). **F.** Statistical significance in percentage of dead cell calculated by Student's t-test (Prism5 software, GraphPad, San Diego, CA, USA).

**A**

| Time | Ctr                  | Ctr + DMSO          | Ctr + Trolox         | RPM                 | RPM + DMSO           | RPM + Trolox         |
|------|----------------------|---------------------|----------------------|---------------------|----------------------|----------------------|
| 24 h | 740000 $\pm$ 140000  | 728000 $\pm$ 117000 | 725000 $\pm$ 25000   | 627000 $\pm$ 12800  | 653000 $\pm$ 91000   | 775000 $\pm$ 33000   |
| 48 h | 1262000 $\pm$ 87500  | 1211000 $\pm$ 65000 | 1150000 $\pm$ 100000 | 925000 $\pm$ 75000  | 917000 $\pm$ 32000   | 1163000 $\pm$ 112000 |
| 72 h | 1491400 $\pm$ 120000 | 1513000 $\pm$ 97000 | 1612500 $\pm$ 62500  | 1095000 $\pm$ 95000 | 990000 $\pm$ 105000  | 1522000 $\pm$ 27500  |
| 96 h | 1530000 $\pm$ 93000  | 1589000 $\pm$ 99100 | 1597000 $\pm$ 75000  | 1150000 $\pm$ 85000 | 1203000 $\pm$ 117000 | 1562000 $\pm$ 112500 |

**B**

| Sample comparison        | 24 h      | 48 h      | 72 h      | 96 h      |
|--------------------------|-----------|-----------|-----------|-----------|
| Ctr vs RPM               | p = 0.583 | *p< 0.05  | *p< 0.05  | *p< 0.05  |
| Ctr+DMSO vs RPM+DMSO     | p = 0.640 | *p< 0.05  | *p< 0.05  | *p< 0.05  |
| Ctr+Trolox vs RPM+Trolox | p = 0.294 | p = 0.935 | p = 0.256 | p = 0.809 |
| Ctr+DMSO vs Ctr+Trolox   | p = 0.981 | p = 0.636 | p = 0.437 | p = 0.952 |
| RPM+DMSO vs RPM+Trolox   | p = 0.276 | *p< 0.05  | *p< 0.05  | *p< 0.05  |

**C**

| Time | Ctr              | Ctr + DMSO       | Ctr + Trolox     | RPM              | RPM + DMSO       | RPM + Trolox     |
|------|------------------|------------------|------------------|------------------|------------------|------------------|
| 24 h | 22200 $\pm$ 1110 | 21840 $\pm$ 1092 | 21750 $\pm$ 1050 | 19810 $\pm$ 2100 | 20896 $\pm$ 1940 | 24800 $\pm$ 1550 |
| 48 h | 44170 $\pm$ 2325 | 42333 $\pm$ 2900 | 41959 $\pm$ 3150 | 29600 $\pm$ 2850 | 29934 $\pm$ 1467 | 39316 $\pm$ 2900 |
| 72 h | 59656 $\pm$ 2889 | 63546 $\pm$ 3890 | 64500 $\pm$ 2955 | 43800 $\pm$ 2500 | 41580 $\pm$ 2900 | 60500 $\pm$ 3157 |
| 96 h | 61200 $\pm$ 2448 | 65540 $\pm$ 3570 | 63888 $\pm$ 2194 | 46000 $\pm$ 2350 | 48120 $\pm$ 2110 | 62580 $\pm$ 3126 |

**D**

| Sample comparison        | 24 h      | 48 h      | 72 h      | 96 h      |
|--------------------------|-----------|-----------|-----------|-----------|
| Ctr vs RPM               | p = 0.371 | *p< 0.05  | *p< 0.05  | *p< 0.05  |
| Ctr+DMSO vs RPM+DMSO     | p = 0.693 | *p< 0.05  | *p< 0.05  | *p< 0.05  |
| Ctr+Trolox vs RPM+Trolox | p = 0.179 | p = 0.571 | p = 0.407 | p = 0.749 |
| Ctr+DMSO vs Ctr+Trolox   | p = 0.955 | p = 0.935 | p = 0.855 | p = 0.714 |
| RPM+DMSO vs RPM+Trolox   | p = 0.191 | *p< 0.05  | *p< 0.05  | *p< 0.05  |

**E**

| Time | Ctr             | Ctr + DMSO      | Ctr + Trolox    | RPM             | RPM + DMSO      | RPM + Trolox    |
|------|-----------------|-----------------|-----------------|-----------------|-----------------|-----------------|
| 24 h | 2.91 $\pm$ 0.14 | 2.91 $\pm$ 0.15 | 2.91 $\pm$ 0.14 | 3.06 $\pm$ 0.32 | 3.10 $\pm$ 0.28 | 3.10 $\pm$ 0.19 |
| 48 h | 3.38 $\pm$ 0.18 | 3.38 $\pm$ 0.23 | 3.52 $\pm$ 0.26 | 3.10 $\pm$ 0.29 | 3.16 $\pm$ 0.15 | 3.27 $\pm$ 0.24 |
| 72 h | 3.74 $\pm$ 0.18 | 4.01 $\pm$ 0.25 | 3.84 $\pm$ 0.18 | 3.85 $\pm$ 0.22 | 4.03 $\pm$ 0.28 | 3.82 $\pm$ 0.19 |
| 96 h | 3.84 $\pm$ 0.15 | 3.96 $\pm$ 0.22 | 3.85 $\pm$ 0.13 | 3.85 $\pm$ 0.19 | 3.84 $\pm$ 0.17 | 3.85 $\pm$ 0.19 |

**F**

| Sample comparison        | 24 h      | 48 h      | 72 h       | 96 h      |
|--------------------------|-----------|-----------|------------|-----------|
| Ctr vs RPM               | p = 0.689 | p = 0.458 | p = 0.7185 | p = 0.969 |
| Ctr+DMSO vs RPM+DMSO     | p = 0.582 | p = 0.468 | p = 0.960  | p = 0.688 |
| Ctr+Trolox vs RPM+Trolox | p = 0.466 | p = 0.519 | p = 0.943  | p> 0.999  |
| Ctr+DMSO vs Ctr+Trolox   | p> 0.999  | p = 0.707 | p = 0.610  | p = 0.689 |
| RPM+DMSO vs RPM+Trolox   | p> 0.999  | p = 0.717 | p = 0.569  | p = 0.971 |
